# Supplementary material for: Restricted hybridisation in the secondary contact zone of closely related haplodiploid social spider mites
Source: Research Square preprint supplement (doi:10.21203/rs.3.rs-3947675/v1), 2024-02-26
Supplement: Supplementary file 2 [file a9b3ea04189210690c94beaa.xlsx]

## Sheet: Sdata1
Supplementary data 1. Body width (DW), body length (DL), and relative length of the first to third legs (RLL) used to construct the discriminant function for species identification by male morphology.
Location	Sex	DW	DL	RLL	Species
Shiofuki	Male	152.457	237.237	0.269352	S.miscanthi HG form
Amagi1	Male	158.533	230.481	0.28525	S.miscanthi HG form
Amagi1	Male	165.434	NA	NA	S.miscanthi HG form
Amagi1	Male	154.756	234.222	0.32097	S.miscanthi HG form
Amagi1	Male	156.404	219.533	0.298457	S.miscanthi HG form
Amagi1	Male	156.899	225.768	0.286497	S.miscanthi HG form
Amagi1	Male	160.238	225.774	0.288648	S.miscanthi HG form
Amagi1	Male	158.446	233.44	0.325964	S.miscanthi HG form
Amagi1	Male	158.821	222.695	0.281562	S.miscanthi HG form
Amagi1	Male	167.45	248.372	0.325446	S.miscanthi HG form
Amagi1	Male	171.122	249.188	0.298224	S.miscanthi HG form
Amagi1	Male	155.219	216.379	0.318728	S.miscanthi HG form
Amagi1	Male	162.148	224.237	0.31973	S.miscanthi HG form
Amagi1	Male	165.162	233.923	0.309962	S.miscanthi HG form
Amagi2	Male	146.73	202.817	0.288862	S.miscanthi HG form
Amagi2	Male	170.233	252.06	0.280038	S.miscanthi HG form
Amagi2	Male	NA	NA	0.283839	S.miscanthi HG form
Amagi2	Male	167.12	240.04	0.30032	S.miscanthi HG form
Amagi2	Male	153.577	229.901	0.295411	S.miscanthi HG form
Amagi2	Male	159.97	238.142	0.306446	S.miscanthi HG form
Amagi2	Male	154.712	233.813	0.278174	S.miscanthi HG form
Amagi2	Male	156.277	230.718	0.283615	S.miscanthi HG form
Amagi2	Male	144.017	212.624	0.314417	S.miscanthi HG form
Amagi2	Male	151.93	220.65	0.291033	S.miscanthi HG form
Amagi2	Male	148.551	216.756	0.328563	S.miscanthi HG form
Amagi2	Male	155.915	221.072	0.27637	S.miscanthi HG form
Amagi2	Male	162.727	232.618	0.2984	S.miscanthi HG form
Amagi2	Male	155.726	241.872	0.303463	S.miscanthi HG form
Amagi2	Male	136.787	189.349	0.283773	S.miscanthi HG form
Amagi2	Male	167.774	241.541	0.304942	S.miscanthi HG form
Amagi2	Male	154.921	219.192	0.310313	S.miscanthi HG form
Shiofuki	Female	166.202	239.237	0.270433	S.miscanthi HG form
Shiofuki	Female	172.931	245.181	0.27841	S.miscanthi HG form
Shiofuki	Female	173.977	240.818	0.289367	S.miscanthi HG form
Shiofuki	Female	169.949	235.114	0.29015	S.miscanthi HG form
Shiofuki	Female	159.628	NA	0.286359	S.miscanthi HG form
Amagi1	Female	170.306	236.188	0.31714	S.miscanthi HG form
Amagi1	Female	162.147	222.775	0.294888	S.miscanthi HG form
Amagi1	Female	154.429	226.526	0.306678	S.miscanthi HG form
Amagi1	Female	160.893	223.633	0.293607	S.miscanthi HG form
Amagi1	Female	154.404	216.295	0.285461	S.miscanthi HG form
Amagi1	Female	165.54	250.98	0.273595	S.miscanthi HG form
Amagi1	Female	157.963	224.76	0.285168	S.miscanthi HG form
Amagi1	Female	175.292	235.45	0.283047	S.miscanthi HG form
Amagi1	Female	162.177	241.204	0.280685	S.miscanthi HG form
Amagi1	Female	174.489	240.641	0.277103	S.miscanthi HG form
Amagi1	Female	160.949	234.965	0.312103	S.miscanthi HG form
Amagi1	Female	175.489	244.022	0.305795	S.miscanthi HG form
Amagi1	Female	155.227	214.244	0.302666	S.miscanthi HG form
Amagi1	Female	160.195	212.146	0.280557	S.miscanthi HG form
Amagi1	Female	166.816	255.425	0.278452	S.miscanthi HG form
Amagi1	Female	162.173	235.744	0.281537	S.miscanthi HG form
Amagi1	Female	177.657	251.303	0.291694	S.miscanthi HG form
Amagi1	Female	168.891	229.955	0.279577	S.miscanthi HG form
Amagi2	Female	157.68	225.924	0.300352	S.miscanthi HG form
Amagi2	Female	177.785	253.493	0.288162	S.miscanthi HG form
Amagi2	Female	166.183	237.604	0.276196	S.miscanthi HG form
Amagi2	Female	171.068	235.656	0.298109	S.miscanthi HG form
Amagi2	Female	170.432	228.563	0.274067	S.miscanthi HG form
Amagi2	Female	169.097	228.728	0.295596	S.miscanthi HG form
Amagi2	Female	150.234	210.071	0.293815	S.miscanthi HG form
Amagi2	Female	155.665	214.124	0.289535	S.miscanthi HG form
Amagi2	Female	172.834	249.681	0.320203	S.miscanthi HG form
Amagi2	Female	181.74	256.142	0.287369	S.miscanthi HG form
Amagi2	Female	181.293	252.917	0.305602	S.miscanthi HG form
Amagi2	Female	154.282	221.859	0.267911	S.miscanthi HG form
Amagi2	Female	160.641	219.5	0.291123	S.miscanthi HG form
Amagi2	Female	162.364	231.122	0.268588	S.miscanthi HG form
Amagi2	Female	166.066	231.266	0.271052	S.miscanthi HG form
Amagi2	Female	158.41	217.881	0.31746	S.miscanthi HG form
Amagi2	Female	190.694	274.146	0.298664	S.miscanthi HG form
Amagi2	Female	173.402	245.617	0.319229	S.miscanthi HG form
Amagi 17	Male	153.672	225.939	0.228537	S.sabelisi
Amagi 17	Male	171.64	249.266	0.196124	S.sabelisi
Amagi 17	Male	157.027	229.672	0.236835	S.sabelisi
Amagi 17	Male	165.422	247.66	0.189459	S.sabelisi
Amagi 17	Male	154.903	221.292	0.227416	S.sabelisi
Amagi 18	Male	165.58	225.651	0.209983	S.sabelisi
Amagi 18	Male	178.77	266.26	0.231305	S.sabelisi
Amagi 18	Male	162.652	245.719	0.225685	S.sabelisi
Amagi 18	Male	171.232	257.469	0.21379	S.sabelisi
Amagi 19	Male	156.969	242.304	0.191398	S.sabelisi
Amagi 19	Male	152.156	233.286	0.20858	S.sabelisi
Amagi 20	Male	171.665	259.583	0.241167	S.sabelisi
Amagi 20	Male	155.675	237.597	0.205654	S.sabelisi
Amagi 20	Male	159.311	248.825	0.193064	S.sabelisi
Amagi 20	Male	154.073	233.473	0.18894	S.sabelisi
Amagi 20	Male	165.591	262.731	0.203307	S.sabelisi
Amagi 17	Female	148.556	216.876	0.209432	S.sabelisi
Amagi 17	Female	169.207	249.335	0.202179	S.sabelisi
Amagi 17	Female	168.225	254.418	0.239341	S.sabelisi
Amagi 17	Female	171.257	252.898	0.231824	S.sabelisi
Amagi 17	Female	168.572	252.963	0.214872	S.sabelisi
Amagi 17	Female	167.439	243.07	0.223377	S.sabelisi
Amagi 17	Female	175.749	256.99	0.204765	S.sabelisi
Amagi 17	Female	159.429	232.5	0.228375	S.sabelisi
Amagi 17	Female	164.972	241.816	0.203897	S.sabelisi
Amagi 17	Female	157.875	222.26	0.214298	S.sabelisi
Amagi 17	Female	158.716	241.392	0.19419	S.sabelisi
Amagi 17	Female	162.517	231.722	0.205202	S.sabelisi
Amagi 17	Female	169.459	255.713	0.205085	S.sabelisi
Amagi 17	Female	167.193	244.318	0.213904	S.sabelisi
Amagi 17	Female	173.806	239.182	0.207313	S.sabelisi
Amagi 17	Female	155.495	228.631	0.21391	S.sabelisi
Amagi 18	Female	164.888	NA	NA	S.sabelisi
Amagi 18	Female	162.439	236.636	0.212482	S.sabelisi
Amagi 18	Female	174.317	260.535	0.196246	S.sabelisi
Amagi 18	Female	162.302	232.119	0.211792	S.sabelisi
Amagi 18	Female	177.639	260.112	0.201955	S.sabelisi
Amagi 18	Female	177.437	269.817	0.228934	S.sabelisi
Amagi 18	Female	159.555	227.291	0.195973	S.sabelisi
Amagi 18	Female	176.65	250.408	0.214946	S.sabelisi
Amagi 18	Female	169.429	241.254	0.225354	S.sabelisi
Amagi 18	Female	154.129	215.023	0.203058	S.sabelisi
Amagi 18	Female	175.135	254.361	0.23363	S.sabelisi
Amagi 18	Female	166.498	237.54	0.204881	S.sabelisi
Amagi 18	Female	174.007	NA	0.200697	S.sabelisi
Amagi 18	Female	176.138	260.104	0.192549	S.sabelisi
Amagi 18	Female	183.239	260.771	0.216564	S.sabelisi
Amagi 18	Female	176.242	267.504	0.19526	S.sabelisi
Amagi 18	Female	171.68	251.102	0.219018	S.sabelisi
Amagi 19	Female	136.599	201.636	0.160577	S.sabelisi
Amagi 19	Female	173.438	255.303	0.199568	S.sabelisi
Amagi 19	Female	165.439	249.234	0.199114	S.sabelisi
Amagi 20	Female	157.925	234.354	0.218446	S.sabelisi
Amagi 20	Female	159.966	243.444	0.213517	S.sabelisi
Amagi 20	Female	159.973	223.282	0.220277	S.sabelisi
Amagi 20	Female	165.386	252.033	0.193577	S.sabelisi
Amagi 20	Female	161.438	227.169	0.205421	S.sabelisi

## Sheet: Sdata2
Supplementary data 2. Body width (DW), body length (DL), and relative length of the first to third legs (RLL) used for species identification in males and females (males developed from reared immatures ) by male morphology.
Location	Sex	DW	DL	RLL
Amagi3	Female	164.129	230.706	0.313797
Amagi3	Female	160.35	211.95	0.297666
Amagi3	Female	162.964	229.047	0.334951
Amagi3	Female	144.888	214.061	0.294263
Amagi3	Female	165.495	227.877	NA
Amagi3	Female	154.928	212.774	0.279613
Amagi3	Female	149.713	230.78	0.306241
Amagi3	Female	155.9	216.442	0.280347
Amagi3	Female	164.631	235.177	0.284655
Amagi4	Female	171.576	250.992	0.20652
Amagi4	Female	156.934	217.89	0.31138
Amagi4	Female	156.046	218.243	0.300149
Amagi4	Female	160.39	203.412	0.305082
Amagi4	Female	154.431	220.387	0.332062
Amagi4	Female	156.2	230.707	0.221294
Amagi4	Female	157.801	222.871	0.212066
Amagi4	Female	169.919	254.936	0.229013
Amagi4	Female	154.351	226.169	0.303939
Amagi4	Female	157.896	233.902	0.213713
Amagi4	Female	176.004	281.919	0.214268
Amagi5	Female	154.662	227.805	0.212323
Amagi5	Female	176.062	246.066	0.204857
Amagi5	Female	177.21	256.102	0.226777
Amagi5	Female	146.222	216.119	0.253295
Amagi5	Female	151.869	218.541	0.277167
Amagi5	Female	173.462	249.278	0.20477
Amagi5	Female	156.913	230.153	0.244277
Amagi5	Female	170.184	240.824	0.309472
Amagi5	Female	163.57	233.769	0.271063
Amagi5	Female	158.637	223.393	0.225721
Amagi5	Female	168.945	244.25	0.224303
Amagi5	Female	170.29	249.926	0.21167
Amagi5	Female	176.854	243.347	0.217583
Amagi5	Female	174.305	257.832	0.191402
Amagi5	Female	166.674	244.164	0.223774
Amagi5	Female	186.632	261.526	0.197128
Amagi6	Female	166.162	228.625	0.20504
Amagi6	Female	167.026	246.575	0.232097
Amagi6	Female	164.125	240.671	0.233866
Amagi6	Female	160.717	232.46	0.225216
Amagi6	Female	157.03	231.127	0.219994
Amagi6	Female	150.18	206.916	0.219591
Amagi6	Female	166.485	238.735	0.218443
Amagi6	Female	168.292	245.768	0.221851
Amagi6	Female	162.172	231.614	0.224395
Amagi6	Female	155.375	232.165	0.203578
Amagi7	Female	158.637	222.887	0.221757
Amagi7	Female	163.905	219.549	0.220476
Amagi7	Female	162.114	230.448	0.205301
Amagi7	Female	170.349	243.603	0.228412
Amagi7	Female	176.062	251.672	0.217173
Amagi7	Female	156.084	220.304	0.248197
Amagi7	Female	160.717	241.37	0.228819
Amagi7	Female	156.241	231.936	0.268868
Amagi8	Female	162.983	233.04	0.201735
Amagi8	Female	166.485	229.649	0.211037
Amagi8	Female	174.426	238.68	0.201858
Amagi8	Female	163.499	222.949	0.220197
Amagi8	Female	159.572	239.513	0.242289
Amagi9	Female	165.122	233.734	0.208269
Amagi9	Female	160.152	247.172	0.218227
Amagi9	Female	149.697	227.216	0.218908
Amagi10	Female	153.447	217.011	0.220243
Amagi10	Female	155.2	213.518	0.205719
Amagi10	Female	164.751	244.7	0.243545
Amagi10	Female	156.2	232.836	0.225542
Amagi10	Female	146.635	208.166	0.202019
Amagi10	Female	167.372	243.668	0.229364
Amagi10	Female	148.335	213.985	0.230275
Amagi10	Female	163.857	232.53	0.229171
Amagi10	Female	151.265	223.197	0.23479
Amagi10	Female	154.322	227.696	0.210781
Amagi10	Female	156.972	231.847	0.222509
Amagi11	Female	160.622	225.726	0.278278
Amagi11	Female	168.573	256.483	0.296525
Amagi11	Female	163.324	240.695	0.30665
Amagi11	Female	165.884	251.882	0.314243
Amagi11	Female	161.487	224.987	0.288492
Amagi11	Female	169.292	246.581	0.287974
Amagi11	Female	171.85	247.933	0.288796
Amagi11	Female	172.023	253.028	0.227327
Amagi11	Female	174.746	255.92	0.304476
Amagi11	Female	NA	258.421	0.202271
Amagi11	Female	158.953	238.308	0.21813
Amagi11	Female	149.236	233.15	0.215545
Amagi11	Female	162.406	236.868	0.210912
Amagi11	Female	162.736	235.909	0.297239
Amagi11	Female	168.03	244.763	0.296426
Amagi11	Female	153.752	235.963	0.248165
Amagi11	Female	151.211	214.764	0.306312
Amagi11	Female	158.243	223.464	0.297953
Amagi11	Female	163.138	NA	0.333089
Amagi12	Female	172.817	248.638	0.176974
Amagi12	Female	159.991	239.447	0.226589
Amagi12	Female	170.993	229.899	0.179045
Amagi12	Female	153.955	228.53	0.227846
Amagi12	Female	171.856	255.25	0.215146
Amagi12	Female	177.24	249.844	0.207804
Amagi12	Female	170.34	233.659	0.207101
Amagi12	Female	154.579	224.747	0.266688
Amagi12	Female	178.57	262.528	0.187414
Amagi12	Female	166.669	237.808	0.190148
Amagi12	Female	169.312	234.394	0.203927
Amagi12	Female	175.608	261.358	0.21493
Amagi12	Female	176.928	267.146	0.203294
Amagi12	Female	165.913	233.877	0.217205
Amagi12	Female	168.703	241.741	0.227661
Amagi12	Female	165.812	252.523	0.21488
Amagi12	Female	177.895	270.901	0.239062
Amagi12	Female	159.907	245.144	0.204984
Amagi12	Female	172.731	250.052	0.206135
Amagi12	Female	166.669	244.026	0.222735
Amagi12	Female	167.55	249.063	0.241981
Amagi12	Female	154.695	228.877	0.24265
Amagi12	Female	163.269	230.746	0.23572
Amagi12	Female	169.969	238.806	0.202644
Amagi12	Female	173.995	248.156	0.193561
Amagi12	Female	174.447	259.825	0.207631
Amagi12	Female	176.47	254.373	0.218237
Amagi13	Female	166.387	238.386	0.247378
Amagi13	Female	171.437	255.757	0.209871
Amagi13	Female	151.909	225.79	0.221764
Amagi13	Female	151.696	235.981	0.265543
Amagi13	Female	160.589	234.298	0.216631
Amagi13	Female	167.716	244.879	0.209396
Amagi13	Female	161.495	232.892	0.207355
Amagi13	Female	163.076	248.371	0.213492
Amagi13	Female	172.797	251.34	0.200794
Amagi13	Female	154.523	228.383	0.203808
Amagi13	Female	159.957	241.674	0.220832
Amagi13	Female	165.943	247.25	0.220117
Amagi13	Female	163.193	237.291	0.20871
Amagi13	Female	156.444	218.834	0.25013
Amagi13	Female	163.526	232.829	0.210669
Amagi13	Female	158.969	228.168	0.228666
Amagi13	Female	154.125	225.764	0.23295
Amagi13	Female	153.802	229.084	0.228061
Amagi13	Female	157.995	223.894	0.235213
Amagi13	Female	151.041	226.57	0.236517
Amagi14	Female	158.928	224.994	0.231996
Amagi14	Female	152.181	223.892	0.225598
Amagi14	Female	159.125	229.116	0.210669
Amagi14	Female	160.037	240.46	0.216436
Amagi14	Female	167.706	238.37	0.226353
Amagi14	Female	174.648	NA	0.21927
Amagi14	Female	174.437	252.929	0.234057
Amagi14	Female	168.41	236.061	0.2267
Amagi15	Female	NA	NA	0.149226
Amagi15	Female	161.931	232.71	0.239911
Amagi15	Female	164.677	236.125	0.210063
Amagi15	Female	153.415	230.445	0.210221
Amagi15	Female	164.36	240.226	0.230458
Amagi15	Female	161.846	231.22	0.232053
Amagi15	Female	176.674	254.808	0.220187
Amagi15	Female	NA	NA	0.229907
Amagi15	Female	167.261	254.643	0.23433
Amagi15	Female	NA	NA	0.212324
Amagi15	Female	163.832	237.122	0.196712
Amagi15	Female	149.972	233.91	0.226164
Amagi16	Female	162.103	239.541	0.234559
Amagi16	Female	156.039	218.145	0.191085
Amagi16	Female	164.665	234.245	0.210658
Amagi16	Female	164.46	245.974	0.185399
Amagi16	Female	173.224	241.227	0.228575
Amagi16	Female	169.879	244.423	0.224678
Amagi16	Female	179.478	266.336	0.217115
Amagi16	Female	163.964	251.519	0.20451
Amagi16	Female	163.787	242.257	0.207944
Amagi16	Female	152.601	220.393	0.230073
Amagi16	Female	163.778	250.974	0.240402
Amagi16	Female	173.345	259.789	0.246541
Amagi16	Female	158.638	232.088	0.208511
Amagi16	Female	162.948	239.334	0.202195
Amagi16	Female	156.855	228.945	0.204404
Amagi16	Female	167.253	229.72	0.202065
Amagi16	Female	158.73	242.881	0.215048
Amagi16	Female	160.707	238.371	0.224003
Amagi16	Female	163.86	249.099	0.224967
Amagi16	Female	151.669	218.542	0.195908
Amagi16	Female	144.716	226.742	0.211748
Amagi16	Female	155.989	225.01	0.244431
Amagi16	Female	169.199	244.851	0.220338
Amagi3	Male	160.312	245.077	0.316339
Amagi3	Male	155.173	210.326	0.280221
Amagi3	Male	144.88	210.881	0.331466
Amagi3	Male	139.525	203.454	0.30239
Amagi3	Male	152.535	227.445	0.295065
Amagi3	Male	160.312	224.004	0.296584
Amagi3	Male	152.552	210.924	0.290982
Amagi3	Male	157.829	232.555	0.294179
Amagi3	Male	154.402	212.721	0.229942
Amagi3	Male	139.525	186.46	0.280319
Amagi3	Male	145.673	205.241	0.296344
Amagi3	Male	154.256	217.576	0.294018
Amagi4	Male	139.515	210.042	0.295278
Amagi4	Male	163.89	255.542	0.216897
Amagi4	Male	161.237	223.246	0.29526
Amagi4	Male	155.405	220.492	0.254666
Amagi4	Male	161.514	244.803	0.206527
Amagi4	Male	158.919	224.69	0.213901
Amagi5	Male	NA	213.283	0.18365
Amagi5	Male	152.712	221.143	0.195522
Amagi5	Male	143.023	214.976	0.210541
Amagi5	Male	148.221	216.437	0.288066
Amagi5	Male	162.193	229.167	0.224176
Amagi5	Male	159.467	236.139	0.21458
Amagi5	Male	151.736	219.483	0.232823
Amagi5	Male	143.941	203.976	0.288023
Amagi5	Male	147.377	223.028	0.307507
Amagi6	Male	149.049	206.77	0.219867
Amagi6	Male	162.054	228.028	0.234524
Amagi6	Male	156.884	237.792	0.255204
Amagi7	Male	154.596	228.808	0.211215
Amagi7	Male	153.772	212.238	0.180252
Amagi7	Male	150.26	221.124	0.224456
Amagi7	Male	157.175	245.008	0.20629
Amagi7	Male	158.145	235.097	0.188786
Amagi7	Male	164.074	242.907	0.223012
Amagi7	Male	152.611	219.429	0.21575
Amagi7	Male	172.847	249.421	0.211985
Amagi8	Male	165.786	241.887	0.217181
Amagi8	Male	157.905	224.417	0.218286
Amagi9	Male	156.495	229.77	0.173234
Amagi9	Male	151.367	234.946	0.201134
Amagi9	Male	154.575	NA	0.180529
Amagi9	Male	157.165	236.78	0.179629
Amagi10	Male	146.573	216.095	0.232085
Amagi10	Male	152.523	231.02	0.184155
Amagi11	Male	155.633	228.605	0.285163
Amagi11	Male	153.82	229.317	0.281276
Amagi11	Male	155.556	230.502	0.302303
Amagi11	Male	160.808	234.227	0.276106
Amagi11	Male	159.74	246.649	0.275317
Amagi11	Male	158.902	219.63	0.303439
Amagi11	Male	154.575	230.291	0.278093
Amagi11	Male	147.666	227.075	0.2271
Amagi11	Male	166.254	245.772	0.295951
Amagi11	Male	157.168	232.376	0.202429
Amagi11	Male	162.349	227.889	0.273172
Amagi11	Male	146.307	200.141	0.288875
Amagi11	Male	155.46	229.321	0.293093
Amagi11	Male	158.792	229.383	0.309509
Amagi12	Male	157.436	240.226	0.209393
Amagi12	Male	161.175	240.305	0.21413
Amagi12	Male	155.706	221.126	0.214439
Amagi12	Male	158.414	232.078	0.163259
Amagi12	Male	154.86	227.774	0.209106
Amagi12	Male	157.493	248.784	0.239578
Amagi12	Male	160.066	241.919	0.232333
Amagi12	Male	152.091	225.815	0.195126
Amagi12	Male	138.576	202.37	NA
Amagi12	Male	152.266	227.48	0.219107
Amagi12	Male	158.384	223.529	0.210534
Amagi12	Male	NA	NA	0.214182
Amagi12	Male	184.981	266.411	0.237602
Amagi12	Male	169.546	250.865	0.200823
Amagi12	Male	154.877	243.988	0.236055
Amagi12	Male	154.993	236.369	0.207003
Amagi12	Male	156.721	230.138	0.225699
Amagi12	Male	159.279	234.844	0.211884
Amagi12	Male	167.005	246.682	0.224934
Amagi12	Male	161.842	247.724	0.200924
Amagi12	Male	158.32	241.502	0.210503
Amagi12	Male	151.625	226.814	0.214312
Amagi12	Male	163.489	244.35	0.22788
Amagi12	Male	157.519	225.124	0.207174
Amagi12	Male	158.301	237.183	0.239278
Amagi12	Male	151.734	226.263	0.223433
Amagi12	Male	167.173	243.097	0.192135
Amagi12	Male	164.374	240.946	0.208998
Amagi12	Male	166.969	242.495	0.190626
Amagi12	Male	151.578	226.474	0.211161
Amagi13	Male	175.043	253.428	0.208301
Amagi13	Male	160.649	232.324	0.251205
Amagi13	Male	167.253	242.487	0.195601
Amagi13	Male	171.842	250.928	0.201263
Amagi13	Male	161.179	241.571	0.207299
Amagi13	Male	159.483	240.783	0.234609
Amagi13	Male	160.314	246.308	0.222522
Amagi13	Male	173.33	247.526	0.196097
Amagi13	Male	159.843	223.243	0.243214
Amagi14	Male	151.13	214.113	0.239729
Amagi14	Male	155.592	234.297	0.236729
Amagi14	Male	152.045	228.144	0.202236
Amagi14	Male	167.797	242.988	0.228228
Amagi14	Male	170.119	248.387	0.281545
Amagi14	Male	167.042	248.552	0.22108
Amagi15	Male	158.588	241.264	0.237133
Amagi15	Male	166.398	250.122	0.224152
Amagi15	Male	163.657	248.517	0.254265
Amagi15	Male	154.365	224.143	0.21161
Amagi15	Male	155.122	226.63	0.223375
Amagi15	Male	158.695	244.647	0.193585
Amagi15	Male	160.396	244.126	0.198554
Amagi15	Male	168.613	259.649	0.205911
Amagi16	Male	165.833	249.481	0.207505
Amagi16	Male	152.364	232.537	0.196041
Amagi16	Male	156.48	237.755	0.206541
Amagi16	Male	162.633	243.254	0.212228
Amagi16	Male	164.538	243.708	0.196078
Amagi16	Male	162.736	260.405	0.208453
Amagi16	Male	156.912	235.522	0.222729
Amagi16	Male	169.544	264.155	0.198683
Amagi16	Male	160.952	235.668	0.182389
Amagi16	Male	151.381	230.435	0.210341
Amagi16	Male	165.275	236.179	0.236761
Amagi16	Male	165.3	238.27	0.218165
Amagi16	Male	148.123	219.85	0.211687
Amagi16	Male	167.814	251.901	0.226552
Amagi16	Male	155.725	242.291	0.228307
Amagi16	Male	160.856	235.55	NA
Amagi16	Male	157.472	243.528	0.222835
Amagi16	Male	172.174	261.533	0.202751
Amagi16	Male	151.381	223.595	0.249501
Amagi16	Male	174.948	255.132	0.236395
Amagi16	Male	158.336	230.983	0.214461
Amagi16	Male	160.554	244.514	0.200177
Amagi16	Male	161.761	238.629	0.212604
Amagi16	Male	151.381	226.731	0.202553
Amagi16	Male	163.765	240.905	0.216626
Amagi16	Male	163.937	242.067	0.235128
Amagi16	Male	161.872	241.931	0.196504
Amagi16	Male	150.516	237.471	0.213864
Amagi16	Male	153.111	228.882	0.198462

## Sheet: Sdata3
Supplementary data 3. The numbers of nests and mites used in the analysis of sex ratio.
Location	Altitude (m)	No. of nest	No. of Female	No. of Male	No. of Immature	No. of Egg	Male ratio	Type
Shiofuki	20	8	48	4	23	133	0.0769231	S.miscanthi HG form
Amagi 1	20	19	70	13	143	267	0.156627	S.miscanthi HG form
Amagi 2	50	18	74	17	157	331	0.186813	S.miscanthi HG form										Mix
Amagi 3	150	14	35	12	59	53	0.255319	Mixture
Amagi 4	160	10	13	6	26	79	0.315789	Mixture
Amagi 5	210	22	20	11	39	52	0.354839	Mixture
Amagi 6	250	7	15	3	25	61	0.166667	S.sabelisi
Amagi 7	280	10	18	8	31	81	0.307692	Mixture
Amagi 8	290	4	6	2	22	20	0.25	S.sabelisi
Amagi 9	300	8	17	4	28	66	0.190476	S.sabelisi
Amagi 10	350	6	7	2	10	25	0.222222	S.sabelisi
Amagi 11	390	17	42	14	122	127	0.25	Mixture
Amagi 12	400	28	80	33	139	293	0.292035	Mixture
Amagi 13	420	11	26	9	84	112	0.257143	Mixture
Amagi 14	430	11	20	6	47	45	0.230769	Mixture
Amagi 15	450	20	27	9	69	132	0.25	S.sabelisi
Amagi 16	460	35	103	29	164	228	0.219697	S.sabelisi
Amagi 17	500	10	25	5	41	92	0.166667	S.sabelisi
Amagi 18	530	21	40	4	50	172	0.0909091	S.sabelisi
Amagi 19	560	4	7	2	7	28	0.222222	S.sabelisi
Amagi 20	680	10	19	5	30	94	0.208333	S.sabelisi

## Sheet: Sdata4
Supplementary data 4. The numbers of eggs, daughters, sons and dead immatures in intra- and inter-specific cross-experiments using S. sabelisi and S. miscanthi HG form collected from Mt. Amagi
Cross combination	Female	Male	No. of Egg	No. of Daughter	No. of Son	No. of Dead immature
Intra	S. sabelisi	S. sabelisi	8	7	1	0
Intra	S. sabelisi	S. sabelisi	12	6	4	2
Intra	S. sabelisi	S. sabelisi	9	8	1	0
Intra	S. sabelisi	S. sabelisi	8	6	2	0
Intra	S. sabelisi	S. sabelisi	11	8	1	2
Intra	S. sabelisi	S. sabelisi	9	7	2	0
Intra	S. sabelisi	S. sabelisi	8	5	2	1
Intra	S. sabelisi	S. sabelisi	6	3	1	2
Intra	S. sabelisi	S. sabelisi	8	6	2	0
Intra	S. sabelisi	S. sabelisi	5	4	1	0
Intra	S. sabelisi	S. sabelisi	4	3	1	0
Intra	S. sabelisi	S. sabelisi	4	3	1	0
Intra	S. sabelisi	S. sabelisi	14	11	1	2
Intra	S. sabelisi	S. sabelisi	13	11	2	0
Intra	S. sabelisi	S. sabelisi	9	8	1	0
Intra	S. sabelisi	S. sabelisi	14	12	2	0
Intra	S. sabelisi	S. sabelisi	7	6	1	0
Intra	S. sabelisi	S. sabelisi	10	8	2	0
Intra	S. sabelisi	S. sabelisi	12	9	3	0
Intra	S. sabelisi	S. sabelisi	13	12	1	0
Intra	S. sabelisi	S. sabelisi	8	7	1	0
Intra	S. sabelisi	S. sabelisi	5	3	1	1
Intra	S. sabelisi	S. sabelisi	8	6	2	0
Intra	S. sabelisi	S. sabelisi	6	4	1	1
Intra	S. sabelisi	S. sabelisi	4	3	1	0
Intra	S. sabelisi	S. sabelisi	7	6	1	0
Intra	S. sabelisi	S. sabelisi	6	5	1	0
Intra	S. miscanthi HG form	S. miscanthi HG form	9	7	1	1
Intra	S. miscanthi HG form	S. miscanthi HG form	5	4	1	0
Intra	S. miscanthi HG form	S. miscanthi HG form	11	9	2	0
Intra	S. miscanthi HG form	S. miscanthi HG form	10	9	1	0
Intra	S. miscanthi HG form	S. miscanthi HG form	3	2	1	0
Intra	S. miscanthi HG form	S. miscanthi HG form	15	10	4	1
Intra	S. miscanthi HG form	S. miscanthi HG form	6	2	0	4
Intra	S. miscanthi HG form	S. miscanthi HG form	10	8	1	1
Intra	S. miscanthi HG form	S. miscanthi HG form	3	3	0	0
Intra	S. miscanthi HG form	S. miscanthi HG form	10	7	3	0
Intra	S. miscanthi HG form	S. miscanthi HG form	10	8	1	1
Intra	S. miscanthi HG form	S. miscanthi HG form	11	9	2	0
Intra	S. miscanthi HG form	S. miscanthi HG form	11	9	2	0
Intra	S. miscanthi HG form	S. miscanthi HG form	9	6	1	2
Intra	S. miscanthi HG form	S. miscanthi HG form	3	2	1	0
Intra	S. miscanthi HG form	S. miscanthi HG form	6	4	2	0
Intra	S. miscanthi HG form	S. miscanthi HG form	6	5	1	0
Intra	S. miscanthi HG form	S. miscanthi HG form	3	2	1	0
Intra	S. miscanthi HG form	S. miscanthi HG form	6	5	1	0
Intra	S. miscanthi HG form	S. miscanthi HG form	6	6	0	1
Intra	S. miscanthi HG form	S. miscanthi HG form	13	8	2	3
Intra	S. miscanthi HG form	S. miscanthi HG form	6	5	1	0
Inter	S. sabelisi	S. miscanthi HG form	11	0	11	0
Inter	S. sabelisi	S. miscanthi HG form	7	1	6	0
Inter	S. sabelisi	S. miscanthi HG form	8	0	8	0
Inter	S. sabelisi	S. miscanthi HG form	3	0	3	0
Inter	S. sabelisi	S. miscanthi HG form	6	0	0	6
Inter	S. sabelisi	S. miscanthi HG form	10	0	10	0
Inter	S. sabelisi	S. miscanthi HG form	6	0	2	4
Inter	S. sabelisi	S. miscanthi HG form	5	0	4	1
Inter	S. sabelisi	S. miscanthi HG form	6	0	6	0
Inter	S. sabelisi	S. miscanthi HG form	8	0	7	1
Inter	S. sabelisi	S. miscanthi HG form	9	0	6	3
Inter	S. sabelisi	S. miscanthi HG form	16	0	13	3
Inter	S. sabelisi	S. miscanthi HG form	6	0	6	0
Inter	S. sabelisi	S. miscanthi HG form	16	0	13	3
Inter	S. sabelisi	S. miscanthi HG form	13	0	12	1
Inter	S. sabelisi	S. miscanthi HG form	8	0	7	1
Inter	S. sabelisi	S. miscanthi HG form	8	1	6	1
Inter	S. sabelisi	S. miscanthi HG form	8	0	6	2
Inter	S. sabelisi	S. miscanthi HG form	5	0	5	0
Inter	S. sabelisi	S. miscanthi HG form	15	0	11	4
Inter	S. sabelisi	S. miscanthi HG form	1	0	0	1
Inter	S. sabelisi	S. miscanthi HG form	6	0	4	2
Inter	S. sabelisi	S. miscanthi HG form	2	0	2	0
Inter	S. sabelisi	S. miscanthi HG form	2	0	2	0
Inter	S. miscanthi HG form	S. sabelisi	6	0	3	3
Inter	S. miscanthi HG form	S. sabelisi	5	0	4	1
Inter	S. miscanthi HG form	S. sabelisi	14	0	6	8
Inter	S. miscanthi HG form	S. sabelisi	17	0	16	1
Inter	S. miscanthi HG form	S. sabelisi	6	0	4	2
Inter	S. miscanthi HG form	S. sabelisi	5	0	5	0
Inter	S. miscanthi HG form	S. sabelisi	14	0	12	3
Inter	S. miscanthi HG form	S. sabelisi	8	0	5	3
Inter	S. miscanthi HG form	S. sabelisi	6	0	6	0
Inter	S. miscanthi HG form	S. sabelisi	10	0	8	2
Inter	S. miscanthi HG form	S. sabelisi	5	3	1	1
Inter	S. miscanthi HG form	S. sabelisi	5	0	4	1
Inter	S. miscanthi HG form	S. sabelisi	8	0	4	4
Inter	S. miscanthi HG form	S. sabelisi	8	0	7	1
Inter	S. miscanthi HG form	S. sabelisi	13	0	11	2
Inter	S. miscanthi HG form	S. sabelisi	9	0	4	5
Inter	S. miscanthi HG form	S. sabelisi	7	0	5	2
Inter	S. miscanthi HG form	S. sabelisi	2	0	2	0
Inter	S. miscanthi HG form	S. sabelisi	11	0	11	0
Inter	S. miscanthi HG form	S. sabelisi	9	0	9	0
Inter	S. miscanthi HG form	S. sabelisi	13	0	11	2
Inter	S. miscanthi HG form	S. sabelisi	6	0	3	0
Inter	S. miscanthi HG form	S. sabelisi	9	0	6	3
Inter	S. miscanthi HG form	S. sabelisi	7	0	5	2
Inter	S. miscanthi HG form	S. sabelisi	5	0	5	0
Virgin	S. sabelisi	No	6	0	5	1
Virgin	S. sabelisi	No	7	0	7	0
Virgin	S. sabelisi	No	5	0	5	0
Virgin	S. sabelisi	No	4	0	4	0
Virgin	S. sabelisi	No	3	0	3	0
Virgin	S. sabelisi	No	7	0	7	0
Virgin	S. sabelisi	No	5	0	3	2
Virgin	S. sabelisi	No	6	0	6	0
Virgin	S. sabelisi	No	4	0	4	0
Virgin	S. sabelisi	No	6	0	5	1
Virgin	S. sabelisi	No	6	0	6	0
Virgin	S. sabelisi	No	6	0	3	3
Virgin	S. sabelisi	No	8	0	7	1
Virgin	S. sabelisi	No	4	0	4	0
Virgin	S. sabelisi	No	5	0	5	0
Virgin	S. sabelisi	No	7	0	7	0
Virgin	S. sabelisi	No	2	0	2	0
Virgin	S. sabelisi	No	2	0	1	1
Virgin	S. sabelisi	No	2	0	2	0
Virgin	S. sabelisi	No	4	0	4	0
Virgin	S. sabelisi	No	5	0	3	2
Virgin	S. sabelisi	No	4	0	4	0
Virgin	S. sabelisi	No	4	0	3	1
Virgin	S. miscanthi HG form	No	6	0	6	0
Virgin	S. miscanthi HG form	No	4	0	4	0
Virgin	S. miscanthi HG form	No	1	0	1	0
Virgin	S. miscanthi HG form	No	5	0	5	0
Virgin	S. miscanthi HG form	No	3	0	3	0
Virgin	S. miscanthi HG form	No	4	0	4	0
Virgin	S. miscanthi HG form	No	6	0	6	0
Virgin	S. miscanthi HG form	No	5	0	5	0
Virgin	S. miscanthi HG form	No	5	0	4	1
Virgin	S. miscanthi HG form	No	1	0	1	0
Virgin	S. miscanthi HG form	No	7	0	3	4
Virgin	S. miscanthi HG form	No	3	0	1	2
Virgin	S. miscanthi HG form	No	8	0	8	0
Virgin	S. miscanthi HG form	No	3	0	2	1
Virgin	S. miscanthi HG form	No	6	0	4	2
Virgin	S. miscanthi HG form	No	2	0	2	0
Virgin	S. miscanthi HG form	No	5	0	5	0
Virgin	S. miscanthi HG form	No	2	0	2	0
Virgin	S. miscanthi HG form	No	3	0	3	0
Virgin	S. miscanthi HG form	No	3	0	3	0
Virgin	S. miscanthi HG form	No	5	0	5	0
