# Supplementary material for: Restricted hybridisation in the secondary contact zone of closely related haplodiploid social spider mites
Source: Research Square preprint supplement (doi:10.21203/rs.3.rs-3947675/v1), 2024-02-26
Supplement: Supplementary file 3 [file b4e2cb94bfbdcd703a789496.docx]

**Table S1** Observed (*H*O) and expected (*H*E) heterozygosites, nucleotide diversity at SNP sites of spider mite populations.

| Type | Location | Altitude (m) | N samples | *H*O | *H*E | Nucleotide diversity at SNP sites |
| --- | --- | --- | --- | --- | --- | --- |
| *S. miscanthi* HG form | Amagi 1 | 20 | 17 | 0.0144 | 0.0117 | 0.0123 |
| Amagi 2 | 50 | 21 | 0.0109 | 0.0088 | 0.0091 |
| Amagi 3 | 150 | 22 | 0.0153 | 0.0112 | 0.0117 |
| Mixture | Amagi 4 | 160 | 9 | 0.0213 | 0.2408 | 0.2592 |
| Amagi 5 | 210 | 15 | 0.0320 | 0.2850 | 0.2989 |
| Amagi 11 | 390 | 17 | 0.0108 | 0.0953 | 0.1038 |
| *S. sabelisi* | Amagi 6 | 250 | 11 | 0.0206 | 0.0181 | 0.0196 |
| Amagi 7 | 280 | 9 | 0.0478 | 0.0436 | 0.0465 |
| Amagi 9 | 300 | 9 | 0.0336 | 0.0290 | 0.0309 |
| Amagi 12 | 400 | 21 | 0.0365 | 0.0374 | 0.0385 |
| Amagi 13 | 420 | 18 | 0.0406 | 0.0333 | 0.0357 |
| Amagi 14 | 430 | 12 | 0.0176 | 0.0117 | 0.0126 |
| Amagi 16 | 460 | 21 | 0.0282 | 0.0228 | 0.0235 |
| Amagi 17 | 500 | 15 | 0.0417 | 0.0356 | 0.0375 |
| Amagi 18 | 530 | 20 | 0.0296 | 0.0260 | 0.0271 |
